# Supplementary material for: A facile hydrothermal synthesis of a reduced graphene oxide modified cobalt disulfide composite electrode for high-performance supercapacitors
Source: Royal Society of Chemistry journal article supplement (doi:10.1039/c5ra25665h), 2015-12-28
Supplement: c5ra25665h1.pdf [file c5ra25665h1.pdf]

## Supplementary Information

### **A facile hydrothermal synthesis of reduced graphene oxide modified cobalt disulfide composite electrode for high-performance supercapacitors**

*Guijing Liu, Bo Wang\*, Lei Wang, Yuhe Yuan and Dianlong Wang\**

*Harbin Institute of Technology, School of Chemical Engineering and Technology, Xidazhi Street, 150001 Harbin, China. Fax: 86 451 86413721; Tel: 86 451 86413751; E-mail: [wangdianlonghit@163.com](mailto:wangdianlonghit@163.com) (D. L. Wang), [wangbo19880804@163.com](mailto:wangbo19880804@163.com) (B. Wang)*

## Figures

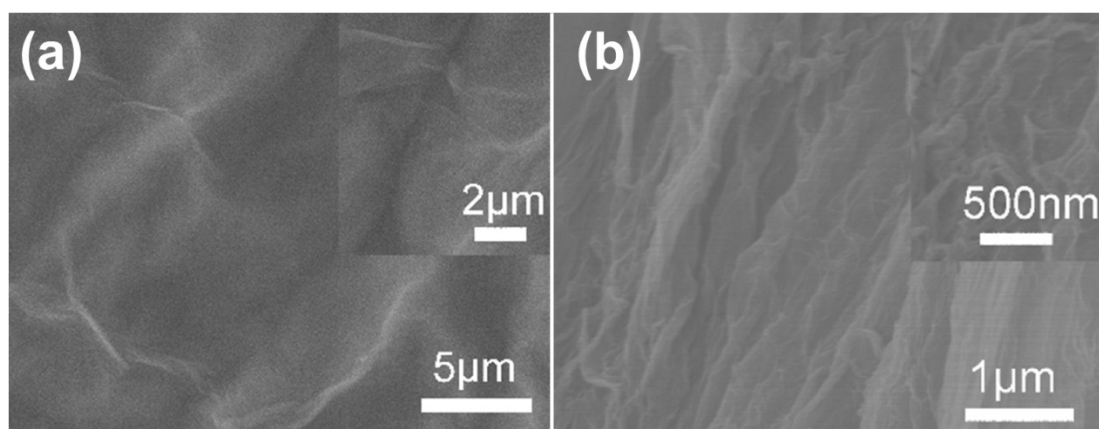

**Fig. S1†** SEM images of (a) GO and (b) RGO.

## Tables

**Table S1†** Supercapacitors performance on some literature of CoS<sub>2</sub> and CoS<sub>2</sub>/Graphene in terms of capacitance, working voltage window, stability, energy density and power density.

| Ref.             | samples                        | capacitance<br>(F/g)        | working voltage<br>window (V)         | stability                      | energy density<br>(Wh/kg) | power density<br>(W/kg) |
|------------------|--------------------------------|-----------------------------|---------------------------------------|--------------------------------|---------------------------|-------------------------|
| 1                | CoS <sub>x</sub>               | 475 (5 mA/cm <sup>2</sup> ) | -0.3 to 0.35 (aqueous electrolyte)    | –                              | –                         | –                       |
| 2                | CoS <sub>1.097</sub> -<br>GE   | 1535 (2 A/g)                | -0.1 to 0.5 (aqueous electrolyte)     | 97% (after 4000 cycles)        | 38.9                      | 9600                    |
| 3                | CoS <sub>2</sub> -GE           | 314 (0.5 A/g)               | -0.6 to 0.4 (aqueous electrolyte)     | 94% (after 1000 cycles)        | –                         | –                       |
| 4                | CoS <sub>2</sub>               | 965 (2 A/g)                 | -0.1 to 0.4 (aqueous electrolyte)     | 66% (after 1000 cycles)        | –                         | –                       |
| 5                | CoS <sub>2</sub>               | 52 (0.7 A/g)                | 0 to 3.0 (organic electrolytes)       | 80% (after 10000 cycles)       | 15                        | 1000                    |
| 6                | CoS <sub>2</sub> -GE           | 331 (0.5 A/g)               | -0.3 to 0.65 (aqueous electrolyte)    | 97% (after 2000 cycles)        | 41.5                      | 238                     |
| <b>This work</b> | <b>CoS<sub>2</sub>RG<br/>O</b> | <b>930.3 (2.0 A/g)</b>      | <b>0 to 1.6 (aqueous electrolyte)</b> | <b>90% (after 6000 cycles)</b> | <b>45.7</b>               | <b>797</b>              |

## References

1. F. Tao, Y.-Q. Zhao, G.-Q. Zhang and H.-L. Li, *Electrochem. Commun.*, 2007, **9**, 1282.
2. B. Qu, Y. Chen, M. Zhang, L. Hu, D. Lei, B. Lu, Q. Li, Y. Wang, L. Chen and T. Wang, *Nanoscale*, 2012, **4**, 7810.
3. B. Wang, J. Park, D. Su, C. Wang, H. Ahn and G. Wang, *J. Mater. Chem.*, 2012, **22**, 15750.
4. L. Zhang, H. B. Wu and X. W. Lou, *Chem Commun (Camb)*, 2012, **48**, 6912.
5. S. Amaresh, K. Karthikeyan, I. C. Jang and Y. S. Lee, *J. Mater. Chem. A*, 2014, **2**, 11099.
6. Y. Ji, X. Liu, W. Liu, Y. Wang, H. Zhang, M. Yang, X. Wang, X. Zhao and S. Feng, *RSC Adv.*, 2014, **4**, 50220.
